# Supplementary material for: Open-top TiO2 nanotube arrays with enhanced photovoltaic and photochemical performances via a micromechanical cleavage approach
Source: Royal Society of Chemistry journal article supplement (doi:10.1039/c5ta02799c), 2015-01-01
Supplement: c5ta02799c1.pdf [file c5ta02799c1.pdf]

Supporting Information

# Open-top TiO<sub>2</sub> Nanotube Arrays with Enhanced Photovoltaic and Photochemical Performances *via* a Micromechanical Cleavage Approach

*Yulong Liao<sup>a,\*</sup>, Dainan Zhang<sup>b</sup>, Qi Wang<sup>a</sup>, Tianlong Wen<sup>a</sup>, Lijun Jia<sup>a</sup>, Zhiyong Zhong<sup>a</sup>,  
Feiming Bai<sup>a</sup>, Longhuang Tang<sup>a</sup>, Wenxiu Que<sup>c</sup> and Huaiwu Zhang<sup>a,\*</sup>*

<sup>a</sup> State Key Laboratory of Electronic Thin Film and Integrated Devices, University of Electronic Science and Technology,  
Chengdu 610054, China

<sup>b</sup> Department of Electrical and Computer Engineering, University of Delaware, Newark, Delaware 19716, USA

<sup>c</sup> School of Electronic and Information Engineering, Xi'an Jiaotong University, Xi'an 710049, Shaanxi, China

---

\* Corresponding author:

Email address: [yulong.liao@uestc.edu.cn](mailto:yulong.liao@uestc.edu.cn) (Y.L.), [hwzhang@uestc.edu.cn](mailto:hwzhang@uestc.edu.cn) (H.Z.)

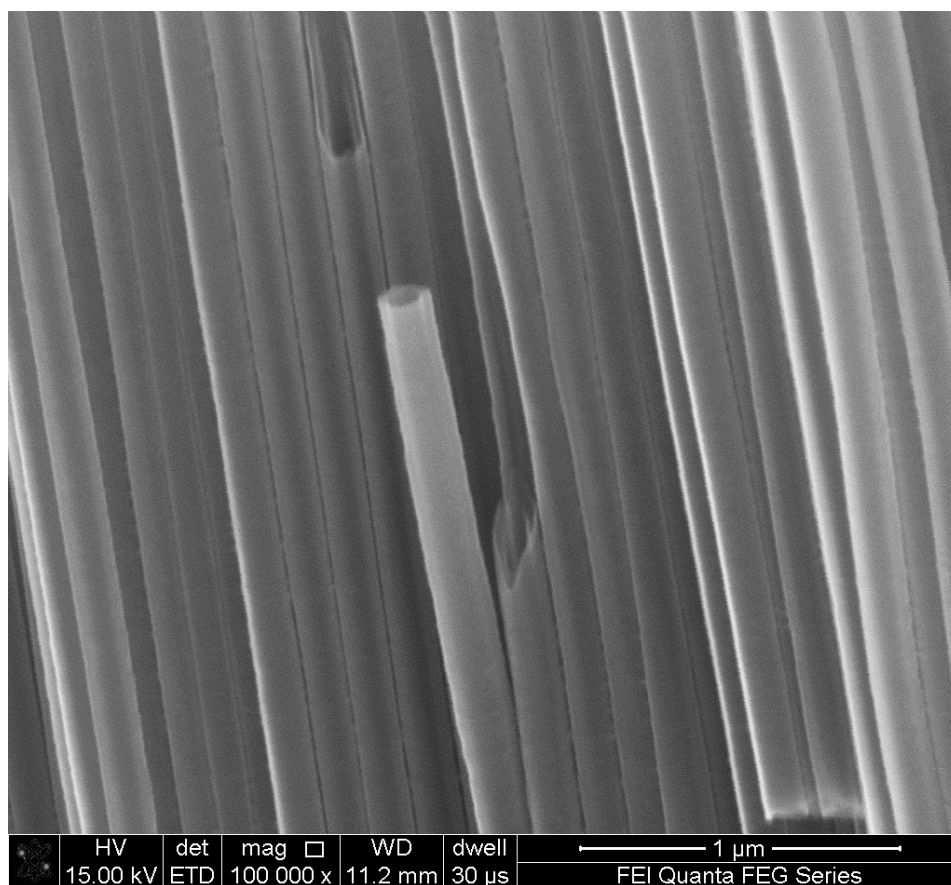

**Figure S1.** SEM image of the side view of anodic TiO<sub>2</sub> NTs, showing the TiO<sub>2</sub> NTs are uniform and well aligned with smooth wall.

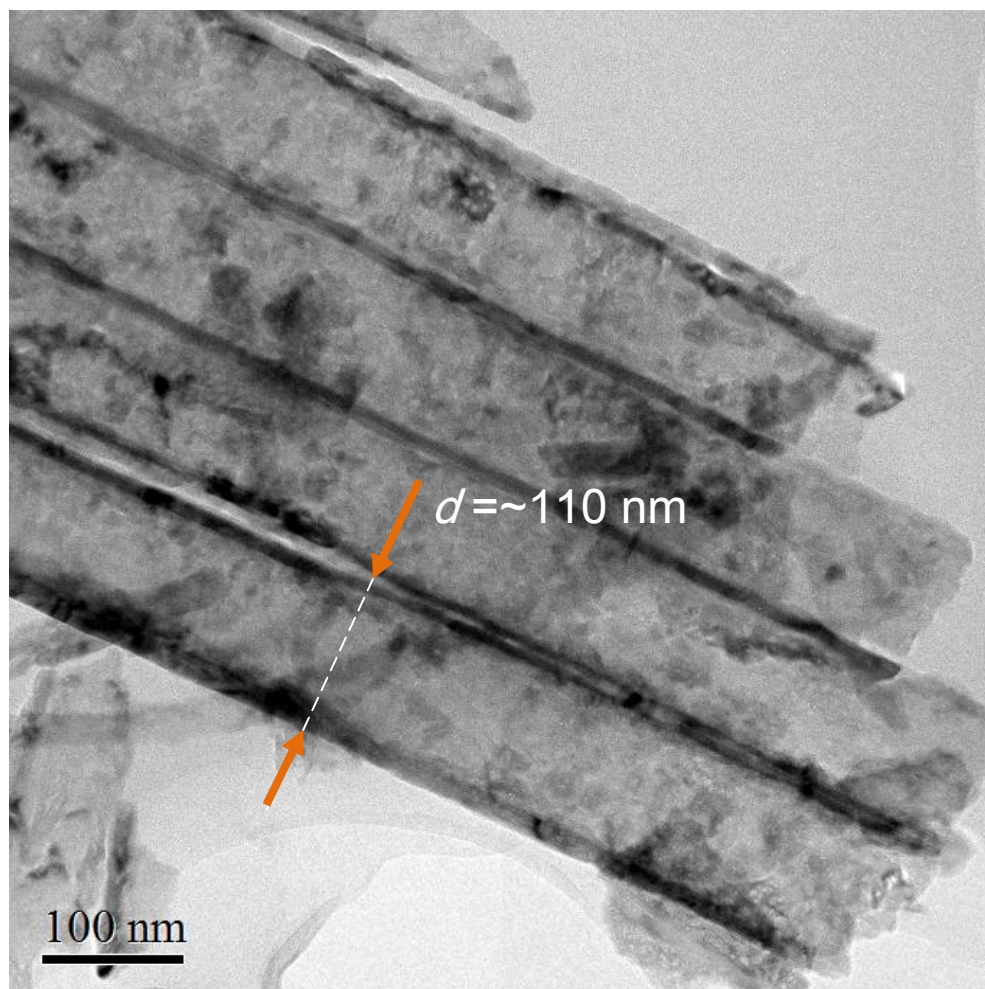

**Figure S2.** TEM image of the anodic TiO<sub>2</sub> NTs, showing highly ordered and uniform the TiO<sub>2</sub> NTs with diameter of  $\sim 110 \text{ nm}$ .

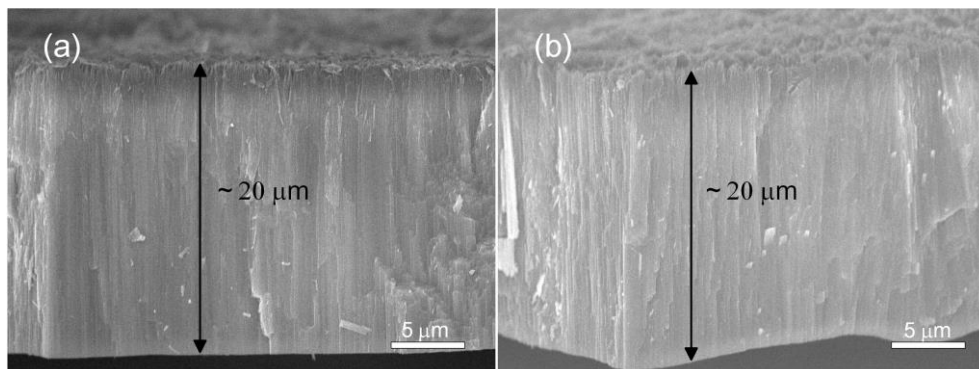

**Figure S3.** SEM images of the side view of anodic TiO<sub>2</sub> NT arrays (a) before and (b) after peeling off the nanograin layer, showing negligible change in thickness.

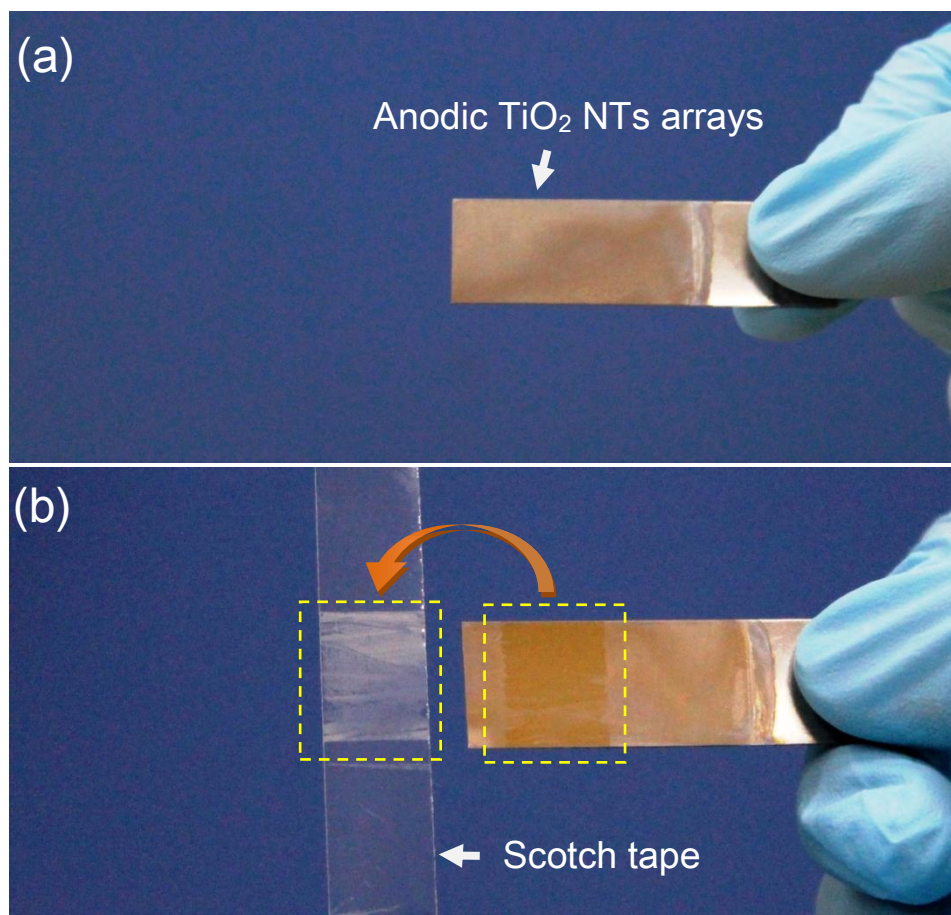

**Figure S4.** Photograph of (a) the as-prepared anodic TiO<sub>2</sub> NT arrays on metal Ti substrate and (b) the peeling off process to remove the nanograss top layer by using scotch tape technique.

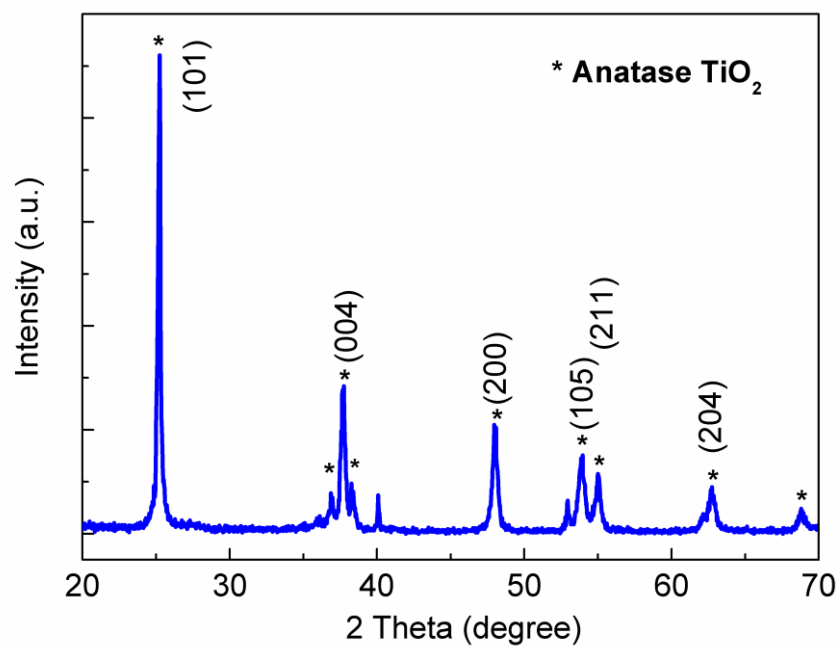

**Figure S5.** XRD patterns of the anodic TiO<sub>2</sub> NT arrays after sintered at 450 °C for 2 h, indicating the anodic TiO<sub>2</sub> NT arrays was crystallized to pure anatase phase.

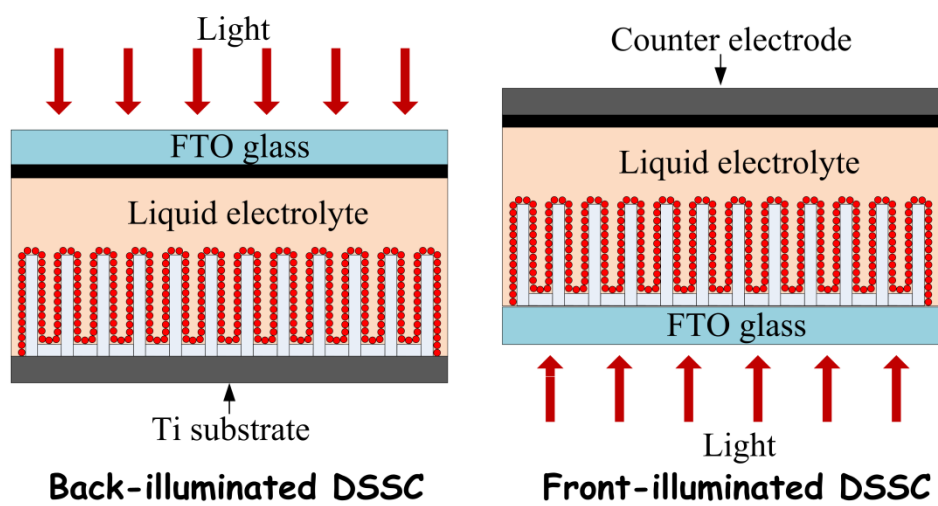

**Figure S6.** Illustration of the structure of a back-illuminated DSSC and a front-illuminated DSSC.

### ***More Experimental Details:***

***Photocatalytic testing:*** The photocatalytic activities of the TiO<sub>2</sub> NT arrays with and without nanoglass top-layer were evaluated on the basis of the degradation of methyl orange (MO, 20 mM L<sup>-1</sup>) as model organic pollutants in aqueous solutions (40 mL total volume). The TiO<sub>2</sub> NT films (3.0 × 1.5 cm<sup>2</sup> surface area, total mass ~ 0.04 g) were immersed in the solution and irradiated with six 4-W UV bulbs (Eiko, Black Light Blue, Shawnee, KS; 18 W/m<sup>2</sup> measured illumination intensity). Before testing, the samples were soaked for 30 min in dark with magnetic stirring to reach adsorption/desorption equilibrium. The photo-degradation testing lasted for 120 min and were carried out in an open quartz photoreaction vessel with rapid stirring under room temperature. The concentration of the residual MO was measured by a Uv-vis spectrometer at 463 nm.

In order to simulate the molecular transportation (e.g. MO molecule) inside the TiO<sub>2</sub> NTs, we also solve the molecular diffusion equation by Finite-difference Methods for nanoglass-capped TiO<sub>2</sub> NTs and top opened TiO<sub>2</sub> NTs.
